# Supplementary material
Source: Springer Nature journal article supplement (https://www.springermedizin.de/resource/supplementary/12879_2008_873_MOESM2_ESM.pdf/9449538)

**A**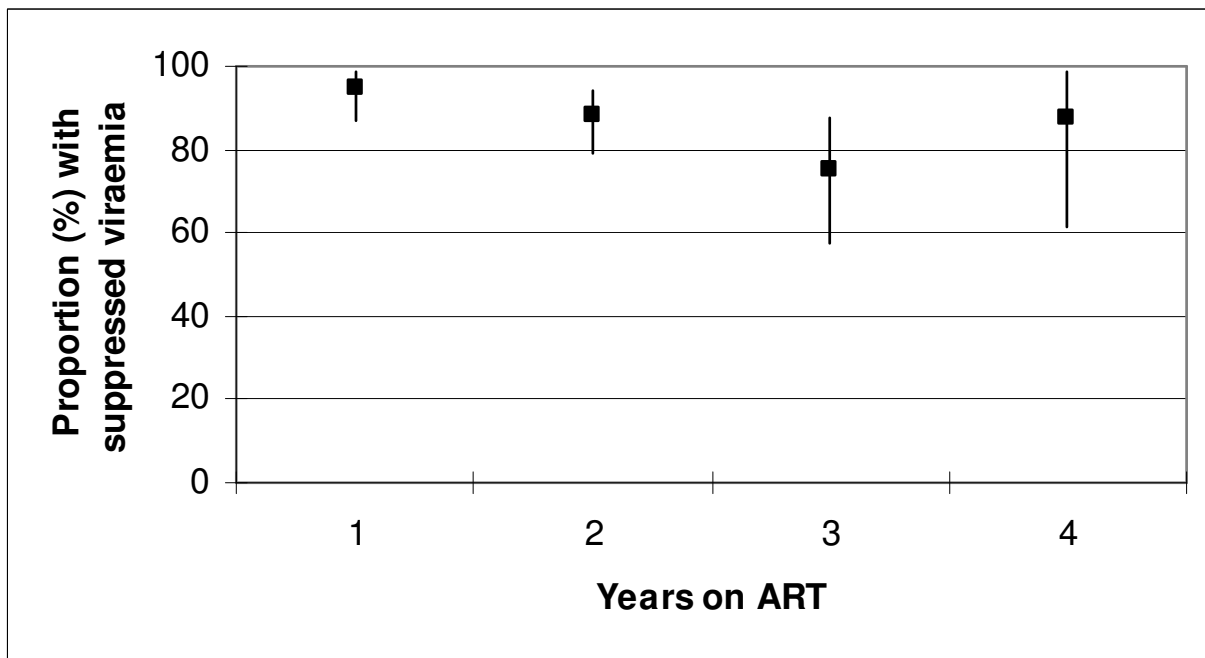**B**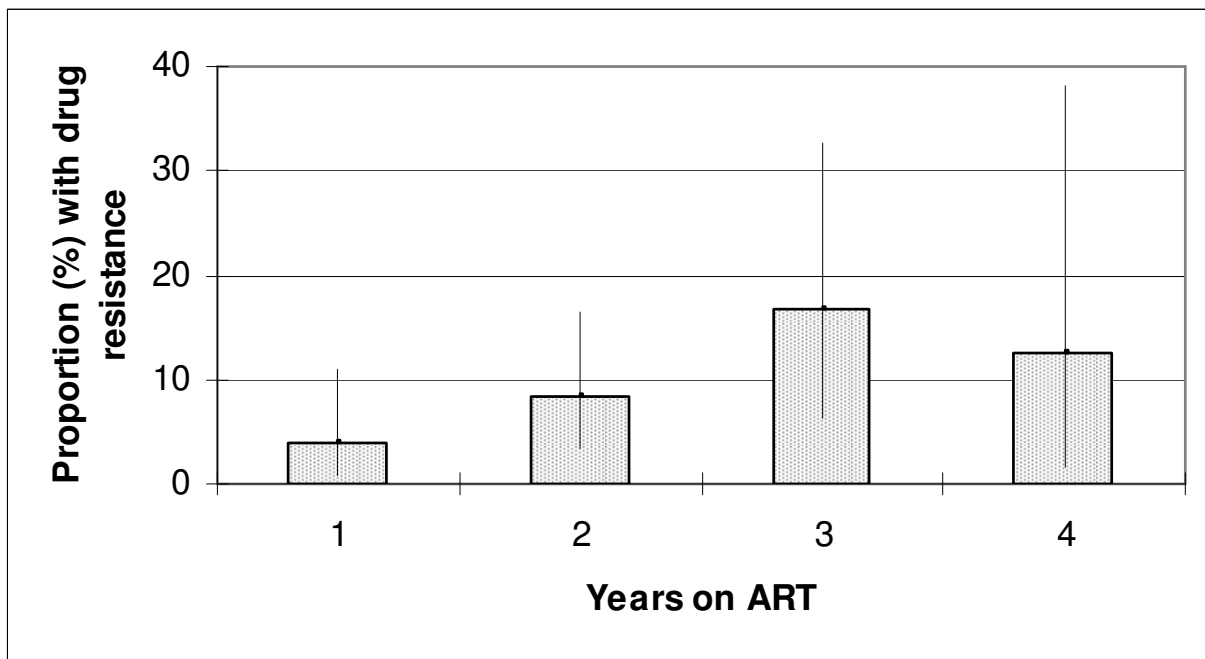

No. under observation

77

83

36

16

Supplement: MOESM2 [file 9449538]
